# Supplementary material for: A Unique Reverse Adaptation Mechanism Assists Bordetella pertussis in Resistance to Both Scarcity and Toxicity of Manganese
Source: PubMed Central journal article supplement (PMC8546581; doi:10.1128/mbio.01902-21), 2021-10-26
Supplement: mbio.01902-21-sf001.pdf [file mbio.01902-21-sf001.pdf]

|                                          | 110          | 120             | 130      | 140      | 150                 |
|------------------------------------------|--------------|-----------------|----------|----------|---------------------|
| <i>Bordetella pertussis</i> _Tohama_I    | AAINADQRR..  | LARDQAWFMGVVFKV | ALGLLAF  | AWKP..   | WLGLEFLAVYGLVY      |
| <i>Aeromonas veronii</i>                 | RAIDGEVQRE.. | IGRDQRWFMGIFL   | VATALGLV | AFTGKS.. | WLAPLFLVYLVY        |
| <i>Bordetella pertussis</i> _Mn_resister | AAINADQRR..  | LARDQAWFMGVVFKV | ALGLLAF  | AWKP..   | WLGLEFLAVYGLVY      |
| <i>Bordetella bronchiseptica</i>         | AAINADQRR..  | LARDQAWFMGVVFKV | ALGLLAF  | AWKP..   | WLGLEFLAVYGLVY      |
| <i>Escherichia coli</i>                  | AKIRVDYAR..  | MSHDQAFVAVVFKV  | ALGLLAF  | VFTLKP.. | WLGVLFLVAYALVY      |
| <i>Clostridium perfringens</i>           | LVIKKHIKND   | IVNLIATFILYVFT  | .FTGLIG  | SKNSLSRI | DGGILVLMCITYII      |
| <i>Methanocaldococcus jannaschii</i>     | IIVDKN....   | LQKNILVYLLVFAA  | VIGIDG   | FS....   | WIDGVVLLIL..        |
| <i>Chlamydomonas reinhardtii</i>         | MYHSVQTFN..  | AMSNRACSSLLMLA  | .CIGIS   | .IPSA... | .ASMLLVTDPALRA      |
| <i>Dictyostelium discoideum</i>          | RNRKGGSFQ..  | LQPPVKKQCLILL   | ..LSLL   | .IP....  | .LFLSLVGYNVFFG      |
| <i>Saccharomyces cerevisiae</i>          | YNRVQOTFN..  | QTAAQTMSSLLATA  | .CASLL   | .IPAA... | .FRATLPHGKEDHFIDGK  |
| <i>Caenorhabditis elegans</i>            | RPFKAIEVFS.. | SIRDLAFYLVAF    | .LAFCFV  | .YYDHVEI | WMPITFLGVYLIYVCTVIL |
| <i>Arabidopsis thaliana</i>              | RDVSIIDRNS.. | VIRDLVFFLLVALC  | .CLGLI   | IFIGVIT  | WVALCYLSIYLVYV      |
| <i>Drosophila melanogaster</i>           | QPTKLDWWP..  | VTRDTAWYLIATAS  | .LTYVL   | .WDSLVMW | YEAVALLLYISYVI      |
| <i>Danio rerio</i>                       | AVGRLLSCWP.. | LFRCVAYISISVAA  | .VIAII   | .SDNRVY  | WDGACLFLVYGVYVA     |
| <i>Xenopus laevis</i>                    | SISRLTQWP..  | LFRCVAYAISVAA   | .VIAIT   | .FDNRIY  | WESASLLIYGIYIV      |
| <i>Gallus gallus</i>                     | QVVCLTQWA..  | VFRDSVYVYTLVVI  | .LIVFI   | .HDEKIEW | WESLVLITMYSFYIL     |
| <i>Mus musculus</i>                      | MVSTLSCWP..  | LFRCVAYAVSVGA   | .VFGII   | .FDNRIY  | WEGAGLLIYGLYVL      |
| <i>Homo sapiens</i>                      | QVVRLLTWWA.. | VCRDSVYVYTLVVI  | .LIVFI   | .YDEQIV  | WVEGLVLLIYVYVYIL    |

|                                          | 160                                                        | 170                                          |
|------------------------------------------|------------------------------------------------------------|----------------------------------------------|
| <i>Bordetella pertussis</i> _Tohama_I    | .....KRELTREEE..                                           | .....CLDCEDLE..                              |
| <i>Aeromonas veronii</i>                 | .....RRELKQSDS..                                           | .....HEVELPE..                               |
| <i>Bordetella pertussis</i> _Mn_resister | .....KRELTREEE..                                           | .....CLDCEDLE..                              |
| <i>Bordetella bronchiseptica</i>         | .....KRELTREEE..                                           | .....CLDCEDLE..                              |
| <i>Escherichia coli</i>                  | .....WREIRNSDT..                                           | .....APEEEMI..                               |
| <i>Clostridium perfringens</i>           | ..YL...IYTVKRSNK..                                         | ..KEDEVALTAEIED..                            |
| <i>Methanocaldococcus jannaschii</i>     | ..YL...RWTVKNGSA..                                         | ..VKNV...EIEE..                              |
| <i>Chlamydomonas reinhardtii</i>         | ..DW...ILDVSRGTA..                                         | ..VIMLICACYLTF..                             |
| <i>Dictyostelium discoideum</i>          | .....IFG.....                                              | ..IYYLIFIGYSLFHKLPE..                        |
| <i>Saccharomyces cerevisiae</i>          | .....ILELSRGT.S..                                          | .....IVILIVYVLFYFQ..                         |
| <i>Caenorhabditis elegans</i>            | SQILHNRHKKDEEKVDEKTVDTDSLEDDDDIYVSHGHVHLHAHEVMKMEAEIEAVE.. | ..RMSDQLRSREDLAE..                           |
| <i>Arabidopsis thaliana</i>              | ..FLSVSHFFDRKK..                                           | .....RMSDQLRSREDLAE..                        |
| <i>Drosophila melanogaster</i>           | ..QL...SFDRIQNLV..                                         | ..RHEHAESLLEDDEPDM..                         |
| <i>Danio rerio</i>                       | ..VL...CFDLKISEY..                                         | ..VMQRFSPCCWCLKPRDR..                        |
| <i>Xenopus laevis</i>                    | ..IM...CFDIKISKY..                                         | ..VVRRFSPCCACCAEAMVBE..                      |
| <i>Gallus gallus</i>                     | ..IM...KYNVRMQNF..                                         | FTLKSXNVGNGDITVDNEMEDGNKCYDSSCDDPSIPLLWKKVKG |
| <i>Mus musculus</i>                      | ..LL...CFDVTISRH..                                         | .....VMKTCSPCCCLARAMEE..                     |
| <i>Homo sapiens</i>                      | ..IM...KYNVQKMAFF..                                        | .....TVKQKSIANGNPVNSELEAVKE                  |

|                                          |                                                             |                            |
|------------------------------------------|-------------------------------------------------------------|----------------------------|
| <i>Bordetella pertussis</i> _Tohama_I    | .....                                                       | PLK.....                   |
| <i>Aeromonas veronii</i>                 | .....                                                       | PLKL.....                  |
| <i>Bordetella pertussis</i> _Mn_resister | .....                                                       | PLK.....                   |
| <i>Bordetella bronchiseptica</i>         | .....                                                       | PLK.....                   |
| <i>Escherichia coli</i>                  | .....                                                       | PLK.....                   |
| <i>Clostridium perfringens</i>           | .....                                                       | .....FE                    |
| <i>Methanocaldococcus jannaschii</i>     | .....                                                       | .....                      |
| <i>Chlamydomonas reinhardtii</i>         | .....                                                       | QLK.....                   |
| <i>Dictyostelium discoideum</i>          | .....DEKKEDRD..                                             | .....IEMGERKNGANEQTFAST..  |
| <i>Saccharomyces cerevisiae</i>          | .....                                                       | LG.....                    |
| <i>Caenorhabditis elegans</i>            | .....                                                       | PLKTWSFRGVVHDFKEHLKPW..... |
| <i>Arabidopsis thaliana</i>              | .....                                                       | MGVSLLYIAEKLALPEKTT.....   |
| <i>Drosophila melanogaster</i>           | .....TREEE.....                                             | PLKGFDRDHVCAKPK.....       |
| <i>Danio rerio</i>                       | .....SGEQQ.....                                             | PLVGWSDSSLRVQRRSR.....     |
| <i>Xenopus laevis</i>                    | .....NTEHA.....                                             | PLLGWKEESLPVIRRHRS.....    |
| <i>Gallus gallus</i>                     | VQOYGNKNSVVMVDEIICSSPPKYRFPEAGLRIMITNKFGPRTMRMASRIIINERQLIQ | .....SDSGIFQ               |
| <i>Mus musculus</i>                      | .....RIEQQ.....                                             | TLLGWEDESOLFIRQSR.....     |
| <i>Homo sapiens</i>                      | KPQYGNKNSVVMVDEIIMSSPPKFTFPEAGLRIMITNKFGPRTLRMASRIIINERQLIN | .....TDSGIFQ               |

|                                          |                                                               |
|------------------------------------------|---------------------------------------------------------------|
| <i>Bordetella pertussis</i> _Tohama_I    | .....                                                         |
| <i>Aeromonas veronii</i>                 | .....                                                         |
| <i>Bordetella pertussis</i> _Mn_resister | .....                                                         |
| <i>Bordetella bronchiseptica</i>         | .....                                                         |
| <i>Escherichia coli</i>                  | .....                                                         |
| <i>Clostridium perfringens</i>           | EQ.....                                                       |
| <i>Methanocaldococcus jannaschii</i>     | .....                                                         |
| <i>Chlamydomonas reinhardtii</i>         | GDD.....                                                      |
| <i>Dictyostelium discoideum</i>          | DDEDTDE.....                                                  |
| <i>Saccharomyces cerevisiae</i>          | QOEEETDEV.....                                                |
| <i>Caenorhabditis elegans</i>            | EMNIFQKVI...AVLNTIPNLFKLTIPHSQPWSKPIITLLQCLICPVFLLFCIQVCS     |
| <i>Arabidopsis thaliana</i>              | EDSPKRRHRSFVSVLVSITIGLPLYLPRRLTIPVVCEEKWSKPCAVVSTATAVLLTLEYCS |
| <i>Drosophila melanogaster</i>           | .....                                                         |
| <i>Danio rerio</i>                       | DDSGYSHLS...LSLHGLNEI.....                                    |
| <i>Xenopus laevis</i>                    | EDSDYSQLS...ISLSGLKEP.....                                    |
| <i>Gallus gallus</i>                     | SANGSSK.P...LQNGRHQNIENGNIPVVNQEEEN.....                      |
| <i>Mus musculus</i>                      | EDSGYS.....                                                   |
| <i>Homo sapiens</i>                      | SANGVSSKP...LQNGRHENIENGNVPVENPEDPQONQEQPPPPQPPPEPEPEV EADF   |

|                                  |           |                  |              |
|----------------------------------|-----------|------------------|--------------|
|                                  | 180       | 190              | 200          |
| Bordetella pertussis Tohama_I    | ..LRPRDPS | PSLFWA...CAQT    | VLAALAVTAAAS |
| Aeromonas veronii                | ..APDAVI  | P..P.VGKV.LLQT   | LALAVVVALAA  |
| Bordetella pertussis Mn_resister | ..LRPRDPS | PSLFWA...CAQT    | VLAALAVTAAAS |
| Bordetella bronchiseptica        | ..LRPRDPS | PSLFWA...CTQT    | VLAALAVTAAAS |
| Escherichia coli                 | ..IRPSAIE | PPMGWI...VLQI    | VLSLIVIAAAS  |
| Clostridium perfringens          | ..NKS     | P..NSTVKN.IILS   | IVGVIILGG    |
| Methanocaldococcus jannaschii    | ..NNDKNN  | P...SVVFSVLVLL   | IIGLIGVLVGA  |
| Chlamydomonas reinhardtii        | ..DDAVPM  | ..MTVGT.S.IGAL   | TVITAVVAVCS  |
| Dictyostelium discoideum         | ..EDEHDE  | P..LYKGVF...YLF  | LGGLLICYFSS  |
| Saccharomyces cerevisiae         | ..MSTISR  | PHHSLSVKSSLVLL   | LGTTVITISFCA |
| Caenorhabditis elegans           | ..LHKEP   | P..FYKSLISYAGF   | LMSIAWYLLIS  |
| Arabidopsis thaliana             | ..KKSHP   | P..KKSFLVWL.LGGF | TMSVTWTYMLIA |
| Drosophila melanogaster          | ..ACTVP   | P..SARSIF.FLSM   | ISAILWLSLIS  |
| Danio rerio                      | ..FVKRR   | P..FVKRR.MLTF    | LMSAVWISAFIT |
| Xenopus laevis                   | ..TKKWF   | P..TKKWF.IILTF   | VMSAVWISAVIT |
| Gallus gallus                    | ..RWESWF  | P..RWESWF.MFTF   | ILSTLWIALFS  |
| Mus musculus                     | ..QLSL    | P...QLSL.LHGL    | SLHGLSQQVSS  |
| Homo sapiens                     | ..RWEKFF  | P..RWEKFF.MVTF   | ITATLWIAVFS  |

|                                  |            |            |              |            |             |              |
|----------------------------------|------------|------------|--------------|------------|-------------|--------------|
|                                  | 210        | 220        | 230          | 240        | 250         | 260          |
| Bordetella pertussis Tohama_I    | HVFVRQTELE | GLGAMGASPH | VAAALLAPVATE | LPEIMNALLI | WVRQGER...  | LALANISGA    |
| Aeromonas veronii                | QLFVHQLES  | MGEELFG    | LSPVLAALLSP  | VATEPELMNV | LWVRQGNR... | LALANISGA    |
| Bordetella pertussis Mn_resister | HVFVRQTELE | GLGAMGASPH | VAAALLAPVATE | LPEIMNALLI | WVRQGER...  | LALANISGA    |
| Bordetella bronchiseptica        | HVFVRQTELE | GLGAMGASPH | VAAALLAPVATE | LPEIMNALLI | WVRQGER...  | LALANISGA    |
| Escherichia coli                 | HIFISQLENI | GTIMHWP    | PHLVGLF      | SPVATELPE  | IMNALLI     | WVRQGER...   |
| Clostridium perfringens          | KIVVDSAS   | ATALGLGL   | LSEKLVGLT    | IVAVIGTS   | LPELVTS     | LVAAKKGG...  |
| Methanocaldococcus jannaschii    | ELFVDGAK   | KIATALD    | ISDKVIG      | FTLVAF     | GTSLPEL     | MVSLAAAKR    |
| Chlamydomonas reinhardtii        | EFLTDSIE   | VSAHTG     | ISETFI       | GLLPIAGN   | ACEHLTAC    | IVAMRNKMD... |
| Dictyostelium discoideum         | KPFDISIV   | LASSWE     | INPIL        | LAF        | FLA         | IAS          |
| Saccharomyces cerevisiae         | DFLVGTID   | NVESTG     | LSKTFI       | GLF        | VI          | IVGNAAEH     |
| Caenorhabditis elegans           | SEVVNV     | VMLGVVSR   | VSHVGL       | GLT        | IL          | LAWSNS       |
| Arabidopsis thaliana             | QELVSL     | LISLGNIFG  | ISPSV        | GLT        | TVLAWGNS    | LGDLIAN      |
| Drosophila melanogaster          | YLLTWF     | LTLGYNLN   | IPDAI        | MGLT       | TVL         | LAAGT        |
| Danio rerio                      | YVLVWM     | VTVG       | ETLGP        | DT         | VM          | GMLL         |
| Xenopus laevis                   | YILVWM     | VTVG       | ETLGP        | DT         | VM          | GMLL         |
| Gallus gallus                    | YFMVWM     | VTVG       | ETLGP        | DT         | VM          | GMLL         |
| Mus musculus                     | E...GETL   | GP         | DT           | VM         | GMLL        | LAAGT        |
| Homo sapiens                     | YIMVWL     | VTVG       | ETLGP        | DT         | VM          | GMLL         |

|                                  |          |          |       |         |            |
|----------------------------------|----------|----------|-------|---------|------------|
|                                  | 270      | 280      | 290   | 300     | 310        |
| Bordetella pertussis Tohama_I    | MMIQATIP | SAMMIQAT | IPSA  | LGIFLTP | WLL...DAPL |
| Aeromonas veronii                | MMIQGTIP | KAMMIQGT | IPKAF | CLFLTP  | WLL...DGMT |
| Bordetella pertussis Mn_resister | MMIQATIP | SAMMIQAT | IPSA  | LGIFLTP | WLL...DAPL |
| Bordetella bronchiseptica        | MMIQATIP | SAMMIQAT | IPSA  | LGIFLTP | WLL...DAPL |
| Escherichia coli                 | MMIQATIP | SAMMIQAT | IPSA  | LGIFLTP | WLL...DAPL |
| Clostridium perfringens          | SNITFN   | ILLILL   | LGLS  | SVI     | SPIT       |
| Methanocaldococcus jannaschii    | SNIAAD   | IGGALAV  | GV    | SLF     | MHPAE      |
| Chlamydomonas reinhardtii        | SSIQIAL  | FALFAIP  | FVAV  | VGWAT   | GHD        |
| Dictyostelium discoideum         | GITKTT   | LLMGIF   | V     | CF      | GUVK       |
| Saccharomyces cerevisiae         | SSLQV    | ALFVTP   | FMVL  | VGWMI   | DVPM       |
| Caenorhabditis elegans           | GQLFNL   | LIG      | FGLP  | FTIA    | KIQG       |
| Arabidopsis thaliana             | GPLFNT   | VIG      | LGVP  | LV      | ISSLAE     |
| Drosophila melanogaster          | SNITFD   | ILVC     | LGLP  | WLL     | KILI       |
| Danio rerio                      | SNITFD   | ILVC     | LGLP  | WLL     | KILI       |
| Xenopus laevis                   | SNITFD   | ILVC     | LGLP  | WLL     | KILI       |
| Gallus gallus                    | SNITFD   | ILVC     | LGLP  | WLL     | KILI       |
| Mus musculus                     | SNITFD   | ILVC     | LGLP  | WLL     | KILI       |
| Homo sapiens                     | SNITFD   | ILVC     | LGLP  | WLL     | KILI       |

|                                  |           |           |               |
|----------------------------------|-----------|-----------|---------------|
|                                  | 320       | 330       | 340           |
| Bordetella pertussis Tohama_I    | L...WLRFR | AAMSVPALS | A...VG...GLY  |
| Aeromonas veronii                | L...WVGFR | GTMAGRLA  | L...VG...LLYL |
| Bordetella pertussis Mn_resister | L...WLRFR | AAMSVPALS | A...VG...GLY  |
| Bordetella bronchiseptica        | L...WLRFR | AAMSVPALS | A...VG...GLY  |
| Escherichia coli                 | L...WQVFR | GIADGRALI | I...VG...GGY  |
| Clostridium perfringens          | IGALIF    | LNKKKEK   | VLTKY...EG    |
| Methanocaldococcus jannaschii    | MSLLYL    | FAKYS     | KIGRW...QG    |
| Chlamydomonas reinhardtii        | AVCVIHAN  | FVADAT    | SHWL...LG     |
| Dictyostelium discoideum         | LLTI...CA | AASG      | GYFNKIK       |
| Saccharomyces cerevisiae         | FI        | AVFLSNYL  | ILDG          |
| Caenorhabditis elegans           | FLA       | ISLIF     | TLIAM         |
| Arabidopsis thaliana             | VGL       | LW...AL   | VIMPK         |
| Drosophila melanogaster          | VVLA      | AV...LY   | LGLLARR       |
| Danio rerio                      | LLS       | IF...LF   | LAVH          |
| Xenopus laevis                   | LFS       | IMF...IF  | VAILH         |
| Gallus gallus                    | LGS       | VALT      | TVILL         |
| Mus musculus                     | NIS       | ILF...LF  | LAVH          |
| Homo sapiens                     | LGS       | VAL...TV  | LGIHL         |

|                                          |     |
|------------------------------------------|-----|
| <i>Bordetella pertussis</i> _Tohama_I    | ... |
| <i>Aeromonas veronii</i>                 | ... |
| <i>Bordetella pertussis</i> _Mn_resister | ... |
| <i>Bordetella bronchiseptica</i>         | ... |
| <i>Escherichia coli</i>                  | ... |
| <i>Clostridium perfringens</i>           | ... |
| <i>Methanocaldococcus jannaschii</i>     | ... |
| <i>Chlamydomonas reinhardtii</i>         | ... |
| <i>Dictyostelium discoideum</i>          | PIA |
| <i>Saccharomyces cerevisiae</i>          | NSL |
| <i>Caenorhabditis elegans</i>            | ... |
| <i>Arabidopsis thaliana</i>              | ... |
| <i>Drosophila melanogaster</i>           | IQD |
| <i>Danio rerio</i>                       | D.. |
| <i>Xenopus laevis</i>                    | D.. |
| <i>Gallus gallus</i>                     | ... |
| <i>Mus musculus</i>                      | V.. |
| <i>Homo sapiens</i>                      | EDD |
