# Supplementary material for: A Unique Reverse Adaptation Mechanism Assists Bordetella pertussis in Resistance to Both Scarcity and Toxicity of Manganese
Source: PubMed Central journal article supplement (PMC8546581; doi:10.1128/mbio.01902-21), 2021-10-26
Supplement: mbio.01902-21-st001.pdf [file mbio.01902-21-st001.pdf]

**Supplementary Table 1. Strains and plasmids used in the study**

| Strain or plasmid                              | Description                                                                                         | Reference  |
|------------------------------------------------|-----------------------------------------------------------------------------------------------------|------------|
| <b>Strains</b>                                 |                                                                                                     |            |
| <i>Escherichia coli</i>                        |                                                                                                     |            |
| SM10( $\lambda$ pir)                           | Maintenance and mobilization of pSS4245 vector                                                      | [1]        |
| XL1 blue                                       | Cloning strain                                                                                      |            |
| <i>Bordetella pertussis</i>                    |                                                                                                     |            |
| Tohama I                                       | Wild-type strain                                                                                    | [2]        |
| <i>BP3410</i> <sub>mutGG</sub>                 | Mutant carrying two point mutations within the riboswitch                                           | This study |
| $\Delta$ <i>BP3410</i>                         | Deletion mutant lacking the <i>BP3410</i> gene                                                      | This study |
| Mn resister                                    | Spontaneous mutant lacking the duplication within the <i>BP3410</i> gene                            | This study |
| Mn resister <sub>c</sub>                       | Mutant lacking the duplication within the <i>BP3410</i> gene due to site-directed mutagenesis       | This study |
| wt (pBBR)                                      | Wild-type strain bearing empty pBBR1MCS plasmid                                                     | This study |
| $\Delta$ <i>BP3410</i> (pBBR)                  | $\Delta$ <i>BP3410</i> strain bearing empty pBBR1MCS plasmid                                        | This study |
| Mn resister <sub>c</sub> (pBBR)                | Mn resister <sub>c</sub> strain bearing empty pBBR1MCS plasmid                                      | This study |
| $\Delta$ <i>BP3410</i> (pBBR:: <i>BP3410</i> ) | $\Delta$ <i>BP3410</i> strain bearing plasmid containing wild type allele of the <i>BP3410</i> gene | This study |
| <b>Plasmids</b>                                |                                                                                                     |            |
| pSS4245                                        | Conjugation vector for allelic exchange in <i>Bordetella pertussis</i>                              | [3]        |
| pBBR1MCS                                       | Broad spectrum vector for cloning in Gram <sup>-</sup> bacteria                                     | [4]        |

1. Simon, R., U. Priefer, and A. Pühler, *A Broad Host Range Mobilization System for In Vivo Genetic Engineering: Transposon Mutagenesis in Gram Negative Bacteria*. Biotechnology, 1983. **1** p. 784–791.
2. Kasuga, T., et al., *Studies on Haemophilis pertussis. III. Some properties of each phase of H. pertussis*. Kitasato Arch Exp Med, 1954. **27**(3): p. 37-47.
3. Inatsuka, C.S., et al., *Pertactin is required for Bordetella species to resist neutrophil-mediated clearance*. Infect Immun, 2010. **78**(7): p. 2901-9.
4. Kovach, M.E., et al., *pBBR1MCS: a broad-host-range cloning vector*. Biotechniques, 1994. **16**(5): p. 800-2.
