# Supplementary material for: A Unique Reverse Adaptation Mechanism Assists Bordetella pertussis in Resistance to Both Scarcity and Toxicity of Manganese
Source: PubMed Central journal article supplement (PMC8546581; doi:10.1128/mbio.01902-21), 2021-10-26
Supplement: mbio.01902-21-st002.pdf [file mbio.01902-21-st002.pdf]

**Supplementary Table S2. Primers used in this study**

| Purpose of the primers                                                  | Sequence (5'→3')*                                                                          |
|-------------------------------------------------------------------------|--------------------------------------------------------------------------------------------|
| Construction of <i>BP3410<sub>mutP</sub></i> mutant (upstream region)   | F: <u>TGAATTCT</u> GTTGTACGCCACCGATT<br>R: <u>AGCTAGCGG</u> CAATCTGCCTGGCC                 |
| Construction of <i>BP3410<sub>mutP</sub></i> mutant (downstream region) | F:TGCTAGCCGCGCACTGTCATTG<br>R: <u>TGAATTC</u> GAACACGTGCGAAGCCA                            |
| Construction of <i>BP3410<sub>GG</sub></i> mutant (upstream region)     | F:TTT <u>GAATTC</u> CAGCTCATACTCGCGCATGCC<br>R:GGATAGAGATGGTTACT <b>TTCCAAT</b> GACAGTGCGC |
| Construction of <i>BP3410<sub>GG</sub></i> mutant (downstream region)   | F:TTT <u>GAATTC</u> GATCGCGCGGCCGCGAGCT<br>R:GCGCACTGTCATTGG <b>AAAGTA</b> ACCATCTCTATCC   |
| Construction of $\Delta$ <i>BP3410</i> mutant (upstream region)         | F:ATAG <u>AGCTC</u> GCACCCGCTCGTCGAG<br>R:ATAG <u>CTAGCC</u> CATGATGACGCGGCCGGA            |
| Construction of $\Delta$ <i>BP3410</i> mutant (downstream region)       | F:ATAG <u>CTAGCT</u> GAGCCGCATGACGCCG<br>R:ATAG <u>AGCTC</u> GTTCAGGCCACGGCCTC             |
| PCR amplicon visualizing duplication loss                               | F:CGGAAATCATGAACGCCCTGATC<br>R:AGCGTAGAAATGCCAGCCCA                                        |
| RT-qPCR analysis of <i>BP3410</i> expression                            | F:CAAGGTCTTCGCAATCCAGG<br>R:CGTGTTCTGTGTTCAAGGTGG                                          |
| RT-qPCR analysis of <i>rpoB</i> expression                              | F:GCTGGGACCCGAGGAAAT<br>R:CGCCAATGTAGACGATGCC                                              |

\*F, forward primer; R, reverse primer; restriction sites are underlined; nucleotides introducing mutations are in bold
